# Supplementary material for: Comparison of Ambulatory Care Access and Quality for Beneficiaries With Disabilities Covered by Medicare Advantage vs Traditional Medicare Insurance
Source: PubMed Central journal article supplement (PMC8903104; doi:10.1001/jamahealthforum.2021.4562), 2022-01-14
Supplement: jamahealthforum-e214562-s001.pdf [file jamahealthforum-e214562-s001.pdf]

## Supplemental Online Content

Johnston KJ, Wen H, Pollack HA. Comparison of ambulatory care access and quality for beneficiaries with disabilities covered by Medicare Advantage vs traditional Medicare insurance. *JAMA Health Forum*. 2022;3(1):e214562.  
doi:10.1001/jamahealthforum.2021.4562

**eMethods.** Propensity Score Weight Adjustment.

**eTable 1.** List of Covariates Used in Estimation of Propensity Score Adjustment.

**eTable 2.** Hosmer-Lemeshow Goodness of Fit Test for Propensity Score.

**eFigure.** Sample Selection Flowchart

**eTable 3.** Comparing Medicare Beneficiaries with Disabilities Included Versus Excluded From Study Sample, Ages 18-64, 2015-2018

**eTable 4.** Characteristics of Community-Dwelling Medicare Beneficiaries with Disability Entitlement Enrolled in Medicare Advantage Versus Traditional Medicare Insurance, Ages 18-64, 2015-2018. After Relaxing Continuous Enrollment Inclusion Criteria

**eTable 5.** Characteristics of Community-Dwelling Medicare Advantage Beneficiaries with Disability Entitlement by Special Needs Plan vs Non Special Needs Plan Enrollment, Ages 18-64, 2015-2018

**eTable 6.** Association of Medicare Advantage vs. Traditional Medicare with Ambulatory Care Access and Quality for Beneficiaries with Disability Entitlement, 2015-2018. With Dartmouth Hospital Referral Region Fixed Effects

**eTable 7.** Association of Medicare Advantage vs. Traditional Medicare with Ambulatory Care Access and Quality for Beneficiaries with Disability Entitlement, 2015-2018. After Relaxing Continuous Enrollment Inclusion Criteria

**eTable 8.** Association of Medicare Advantage vs. Traditional Medicare with Ambulatory Care Access and Quality for Beneficiaries with Disability Entitlement, 2015-2018. Testing for Heterogeneous Treatment Effects by Level of Functional Impairment

**eReferences**

## **eMethods. Propensity Score Weight Adjustment.**

Following the approach previously described by Garrido et al.<sup>1</sup> and similar to the approach previously implemented in the Medicare Current Beneficiary Survey (MCBS) by Cutler et al.,<sup>2,3</sup> the entire sample was reweighted by propensity to enroll in Medicare Advantage (MA) as predicted by observed confounders. Specifically, the entire sample of beneficiaries with disabilities was reweighted by the inverse probability of treatment, defined as enrollment in MA vs traditional Medicare (TM). This was done by calculating the inverse of normalized propensity score weights that were created by estimating a multivariable logistic regression model at the person-year level with the beneficiary demographic, insurance, social, health, and local area covariates listed in **eTable 1** used to predict MA (vs TM) enrollment. The resultant inverse probability of treatment weights were multiplied by the MCBS weights to make them nationally representative. The propensity-adjusted results thus change the distribution of confounders in both MA and TM beneficiaries so that they are the same as the distribution in the entire nationally representative sample, and then by multiplying them with the MCBS weights, the same as the distribution in the national population of beneficiaries with disability entitlement. Model fit was assessed by the Hosmer-Lemeshow test and balance of covariates assessed by comparing reweighted descriptive statistics on each of the covariates for MA vs TM beneficiaries, using the Wald test to assess whether there remained any significant differences. The Hosmer-Lemeshow test results on model fit for the regression model used to calculate propensity score weights indicate a good fit ( $p=0.74$ , **eTable 2**). Covariates were balanced after reweighting the sample with no remaining significant ( $p<.05$ ) differences on any beneficiary characteristics for MA vs TM beneficiaries (**Main Table 2**). In addition, 99.1% of sample observations were on the area of common support for propensity scores.

**eTable 1. List of Covariates Used in Estimation of Propensity Score Adjustment.**

|      |                                |      |                                                 |
|------|--------------------------------|------|-------------------------------------------------|
| [1]  | Age - continuous               | [18] | Obese                                           |
| [2]  | Age Squared - continuous       | [19] | Poor Self-rated Health                          |
| [3]  | Male                           | [20] | ADLs with difficulty/can't do - continuous 0-6  |
| [4]  | Black                          | [21] | IADLs with difficulty/can't do - continuous 0-6 |
| [5]  | Hispanic                       | [22] | Diabetes                                        |
| [6]  | White                          | [23] | Heart Failure                                   |
| [7]  | Veteran                        | [24] | Ischemic Heart Disease                          |
| [8]  | Medicaid                       | [25] | COPD/Asthma                                     |
| [9]  | Private Insurance              | [26] | Mental Health Condition                         |
| [10] | Part D                         | [27] | Intellectual/Developmental Disability           |
| [11] | Income - continuous            | [28] | Rural                                           |
| [12] | Poverty Status $\leq$ 100% FPL | [29] | MA Market Penetration Rate - continuous         |
| [13] | Highschool Graduate            | [30] | Medicaid * Hispanic                             |
| [14] | College Graduate               | [31] | Medicaid * Male                                 |
| [15] | Lives Alone                    | [32] | Part D * MA Market Penetration Rate             |
| [16] | Current Smoker                 | [33] | Private Insurance * Poverty Status              |
| [17] | Alcohol Abuse                  | [34] | MCBS Survey Weight - continuous                 |
|      |                                |      |                                                 |

Notes: Poverty Status is income  $\leq$ 100% federal poverty level; ADLs is Activities of Daily Living; IADLs is instrumental ADLs; MA is Medicare Advantage; MCBS survey weight is the cross-sectional weight assigned to the individual beneficiary-year observation to make it nationally representative and to account for the overall annual selection probability of each person sampled and include adjustments for the stratified sampling design, survey nonresponse, and coverage error.

**eTable 2. Hosmer-Lemeshow Goodness of Fit Test for Propensity Score.**

| Group                                                                                                                                                                                                              | Medicare Advantage Enrollment |          |          | Traditional Medicare Enrollment |          | Total |
|--------------------------------------------------------------------------------------------------------------------------------------------------------------------------------------------------------------------|-------------------------------|----------|----------|---------------------------------|----------|-------|
|                                                                                                                                                                                                                    | Probability                   | Observed | Expected | Observed                        | Expected |       |
| 1                                                                                                                                                                                                                  | 0.0792                        | 37       | 32.6     | 684                             | 688.4    | 721   |
| 2                                                                                                                                                                                                                  | 0.1381                        | 84       | 79.7     | 636                             | 640.3    | 720   |
| 3                                                                                                                                                                                                                  | 0.1913                        | 111      | 119      | 609                             | 601      | 720   |
| 4                                                                                                                                                                                                                  | 0.2480                        | 153      | 157.3    | 567                             | 562.7    | 720   |
| 5                                                                                                                                                                                                                  | 0.3123                        | 204      | 201.3    | 516                             | 518.7    | 720   |
| 6                                                                                                                                                                                                                  | 0.3785                        | 228      | 248.4    | 492                             | 471.6    | 720   |
| 7                                                                                                                                                                                                                  | 0.4499                        | 303      | 297.3    | 417                             | 422.7    | 720   |
| 8                                                                                                                                                                                                                  | 0.5302                        | 355      | 352.1    | 365                             | 367.9    | 720   |
| 9                                                                                                                                                                                                                  | 0.6488                        | 433      | 422.9    | 287                             | 297.1    | 720   |
| 10                                                                                                                                                                                                                 | 0.9479                        | 536      | 533.3    | 184                             | 186.7    | 720   |
| Number of Observations =                                                                                                                                                                                           |                               |          |          | 7201                            |          |       |
| Number of Groups =                                                                                                                                                                                                 |                               |          |          | 10                              |          |       |
| Hosmer-Lemeshow $\chi^2$ statistic (8 DF) =                                                                                                                                                                        |                               |          |          | 5.14                            |          |       |
| Prob > $\chi^2$ =                                                                                                                                                                                                  |                               |          |          | 0.742                           |          |       |
| Notes: Probability is the propensity score calculated from the multivariable logistic regression model predicting Medicare Advantage enrollment using the covariates listed in eTable 1. DF is degrees of freedom. |                               |          |          |                                 |          |       |

**eFigure. Sample Selection Flowchart.**

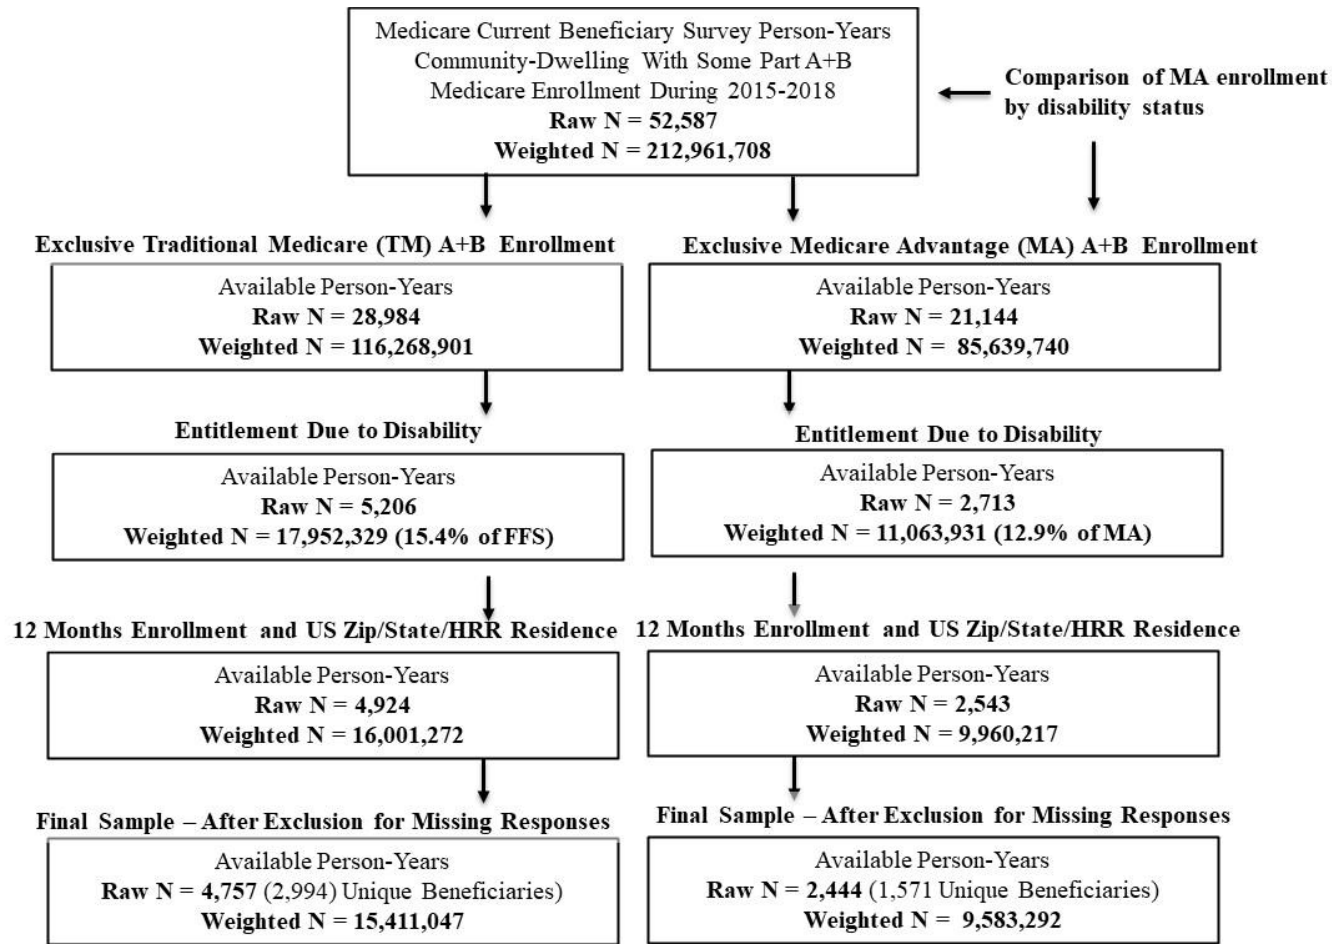

**eTable 3. Comparing Medicare Beneficiaries with Disabilities Included Versus Excluded From Study Sample, Ages 18-64, 2015-2018.**

|                                                                 | Study Sample Beneficiaries <sup>a</sup> | Excluded Beneficiaries <sup>b</sup> | P-Value <sup>c</sup> |
|-----------------------------------------------------------------|-----------------------------------------|-------------------------------------|----------------------|
| <b>Total Number of Patient Years, Unweighted, N<sup>d</sup></b> | <b>7,201</b>                            | <b>718</b>                          | <b>--</b>            |
| <b>Sample Selection Characteristics</b>                         |                                         |                                     |                      |
| Medicare Advantage Enrollment                                   | 38.3%                                   | 718<br>36.8%                        | 0.58                 |
| Traditional Medicare Enrollment                                 | 61.7%                                   | 63.2%                               |                      |
| Months Enrolled, <i>MEAN</i>                                    | 12.0                                    | 8.5                                 | <.001                |
| Died During Year                                                | 0.2%                                    | 13.1%                               | <.001                |
| <b>Demographic Characteristics</b>                              |                                         |                                     |                      |
| Age in Years, <i>MEAN (SD)</i>                                  | 52.1 (11.0)                             | 718<br>52.2 (9.3)                   | 0.81                 |
| Ages 18-24                                                      | 1.7%                                    | 3.8%                                | <.001                |
| Ages 25-29                                                      | 3.0%                                    | 3.8%                                | 0.20                 |
| Ages 30-34                                                      | 4.8%                                    | 3.0%                                | 0.005                |
| Ages 35-39                                                      | 5.6%                                    | 4.2%                                | 0.05                 |
| Ages 40-44                                                      | 7.2%                                    | 6.2%                                | 0.23                 |
| Ages 45-49                                                      | 9.0%                                    | 7.8%                                | 0.46                 |
| Ages 50-54                                                      | 17.6%                                   | 16.7%                               | 0.71                 |
| Ages 55-59                                                      | 26.1%                                   | 26.3%                               | 0.95                 |
| Ages 60-64                                                      | 25.0%                                   | 28.2%                               | 0.21                 |
| <b>Sex</b>                                                      |                                         |                                     |                      |
| Male                                                            | 50.5%                                   | 51.6%                               | 0.73                 |
| Female                                                          | 49.5%                                   | 48.4%                               |                      |
| <b>Minority Race and Ethnicity</b>                              |                                         |                                     |                      |
| Black                                                           | 30.7%                                   | 35.6%                               | 0.001                |
| Hispanic                                                        | 17.4%                                   | 14.5%                               |                      |
| Native American                                                 | 10.2%                                   | 17.0%                               |                      |
| Native American                                                 | 1.4%                                    | 2.0%                                |                      |
| Asian/Pacific Islander                                          | 1.6%                                    | 2.1%                                |                      |
| Other Race and Ethnicity                                        | 69.3%                                   | 59.4%                               |                      |
| White                                                           | 65.1%                                   | 54.5%                               |                      |
| Multiracial                                                     | 4.2%                                    | 4.9%                                |                      |
| Veteran (served in U.S. Armed Forces)                           | 7.7%                                    | 7.3%                                | 0.75                 |
| <b>Other Health Insurance</b>                                   |                                         |                                     |                      |
| Medicaid (dually-enrolled)                                      | 54.0%                                   | 718<br>46.8%                        | 0.02                 |
| Private (including medical, drug, vision, and dental)           | 20.0%                                   | 25.6%                               | 0.02                 |
| Medicare Part D (standalone or with Part C)                     | 87.0%                                   | 81.4%                               | 0.006                |
| <b>Social Risk Factors</b>                                      |                                         |                                     |                      |
| Annual Income in Thousands, <i>MEAN (SD)</i>                    | 25.3 (34.1)                             | 718<br>28.7 (31.4)                  | 0.15                 |
| Poverty (≤100% of Federal Poverty Level)                        | 41.4%                                   | 36.1%                               | 0.08                 |

|                                                                                                                                                                                                                                                                                                                 |           |     |           |       |
|-----------------------------------------------------------------------------------------------------------------------------------------------------------------------------------------------------------------------------------------------------------------------------------------------------------------|-----------|-----|-----------|-------|
| Education                                                                                                                                                                                                                                                                                                       |           |     |           |       |
| No High School or College Education                                                                                                                                                                                                                                                                             | 21.9%     |     | 26.2%     | 0.25  |
| High School / Some College Education                                                                                                                                                                                                                                                                            | 69.3%     |     | 66.0%     |       |
| College / Graduate School Education                                                                                                                                                                                                                                                                             | 8.8%      |     | 7.8%      |       |
| Lives Alone                                                                                                                                                                                                                                                                                                     | 28.4%     | 585 | 22.8%     | 0.06  |
| <b>Health Behaviors and Status</b>                                                                                                                                                                                                                                                                              |           |     |           |       |
| Current Smoker                                                                                                                                                                                                                                                                                                  | 32.8%     | 416 | 25.0%     | 0.02  |
| Alcohol Abuse ( $\geq 4$ Alcoholic Drinks Most Days)                                                                                                                                                                                                                                                            | 19.7%     |     | 15.6%     | 0.16  |
| Obese (Body Mass Index $\geq 30$ )                                                                                                                                                                                                                                                                              | 46.1%     |     | 50.2%     | 0.25  |
| Poor Self-Rated Health                                                                                                                                                                                                                                                                                          | 56.4%     |     | 56.9%     | 0.90  |
| ADLS with Difficulty/Can't Do (0-6), <i>MEAN (SD)</i>                                                                                                                                                                                                                                                           | 1.4 (1.8) |     | 1.6 (1.3) | 0.18  |
| IADLs with Difficulty/Can't Do (0-6), <i>MEAN (SD)</i>                                                                                                                                                                                                                                                          | 1.8 (1.8) |     | 1.9 (1.3) | 0.54  |
| <b>Health Conditions</b>                                                                                                                                                                                                                                                                                        |           |     |           |       |
| Diabetes                                                                                                                                                                                                                                                                                                        | 36.8%     | 491 | 36.8%     | 0.99  |
| Heart Failure                                                                                                                                                                                                                                                                                                   | 9.1%      |     | 9.5%      | 0.84  |
| Ischemic Heart Disease                                                                                                                                                                                                                                                                                          | 15.9%     |     | 17.8%     | 0.46  |
| COPD/Asthma                                                                                                                                                                                                                                                                                                     | 32.5%     |     | 31.5%     | 0.76  |
| Mental Health Condition <sup>e</sup>                                                                                                                                                                                                                                                                            | 65.0%     | 718 | 44.3%     | <.001 |
| Intellectual and/or Developmental Disability                                                                                                                                                                                                                                                                    | 15.4%     |     | 8.9%      | <.001 |
| <b>Local Area Characteristics</b>                                                                                                                                                                                                                                                                               |           |     |           |       |
| Rural                                                                                                                                                                                                                                                                                                           | 24.4%     | 644 | 20.9%     | 0.18  |
| Urban                                                                                                                                                                                                                                                                                                           | 75.6%     |     | 79.1%     |       |
| Medicare Advantage Market Penetration Rate                                                                                                                                                                                                                                                                      | 32.5%     | 715 | 36.2%     | 0.001 |
| <b>Ambulatory Care Access (Study N=6,525)</b>                                                                                                                                                                                                                                                                   |           |     |           |       |
| Usual Source of Care                                                                                                                                                                                                                                                                                            | 87.0%     | 309 | 81.6%     | 0.10  |
| Usual Source of Care is PCP                                                                                                                                                                                                                                                                                     | 73.0%     |     | 67.8%     | 0.18  |
| Specialist Visit                                                                                                                                                                                                                                                                                                | 48.1%     |     | 46.7%     | 0.75  |
| <b>Ambulatory Care Quality</b>                                                                                                                                                                                                                                                                                  |           |     |           |       |
| Blood Cholesterol Checked in Past Year <sup>f</sup> (Study N=2,715)                                                                                                                                                                                                                                             | 88.4%     | 149 | 84.2%     | 0.53  |
| Annual Flu Shot (Study N=6,462)                                                                                                                                                                                                                                                                                 | 55.4%     | 511 | 48.5%     | 0.06  |
| Colon Cancer Screening <sup>g</sup> (Study N=3,233)                                                                                                                                                                                                                                                             | 60.4%     | 186 | 62.2%     | 0.44  |
| Abbreviations: N, number; ADLs, activities of daily living; IADLs, instrumental ADLs; COPD, chronic obstructive pulmonary disease; PCP, primary care clinician; MCBS, Medicare Current Beneficiary Survey.                                                                                                      |           |     |           |       |
| <sup>a</sup> Medicare study sample beneficiaries ages 18-64 living in the community in a U.S. zip code and Hospital Referral Region with a current entitlement status of disabled, with at least 1-calendar-year exclusive continuous enrollment in Medicare and completed the annual survey round in the MCBS. |           |     |           |       |
| <sup>b</sup> The excluded sample are Medicare beneficiaries ages 18-64 living in the community with a current entitlement status of disabled and at least 1 month of exclusive enrollment in Medicare.                                                                                                          |           |     |           |       |
| <sup>c</sup> P-value on the Wald Test of significance, equivalent to the F-statistic for continuous variables and the Chi-squared statistic for categorical variables.                                                                                                                                          |           |     |           |       |

|                                                                                                                                                                                                                                                                                                                                                    |  |
|----------------------------------------------------------------------------------------------------------------------------------------------------------------------------------------------------------------------------------------------------------------------------------------------------------------------------------------------------|--|
| <p><sup>d</sup>Reporting unweighted sample size. Estimates from the 2015-2018 MCBS weighted to be nationally representative using cross-sectional weights accounting for the overall annual selection probability of each person sampled and including adjustments for the stratified sampling design, survey nonresponse, and coverage error.</p> |  |
| <p><sup>e</sup>Self-reported any psychiatric illness, including depression.</p>                                                                                                                                                                                                                                                                    |  |
| <p><sup>f</sup>Self-reported having diabetes, ischemic heart disease, or heart failure and responded to MCBS questions for outcome variable</p>                                                                                                                                                                                                    |  |
| <p><sup>g</sup>Fecal occult blood test at home or doctor's office or colonoscopy or sigmoidoscopy within past 5 years, excluding patients who self-reported having colon cancer or are under age 45.</p>                                                                                                                                           |  |



**eTable 4. Characteristics of Community-Dwelling Medicare Beneficiaries with Disability Entitlement Enrolled in Medicare Advantage Versus Traditional Medicare Insurance, Ages 18-64, 2015-2018. After Relaxing Continuous Enrollment Inclusion Criteria.**

|                                                                 | Medicare Advantage <sup>a</sup> |              | Traditional Medicare <sup>b</sup> |              | P-Value <sup>c</sup> |
|-----------------------------------------------------------------|---------------------------------|--------------|-----------------------------------|--------------|----------------------|
| <b>Total Number of Patient Years, Unweighted, N<sup>d</sup></b> |                                 | <b>2,643</b> |                                   | <b>5,201</b> | --                   |
| <b>Sample Selection Characteristics</b>                         | N=                              |              | N=                                |              |                      |
| Months Enrolled, <i>MEAN</i>                                    | 2643                            | 11.6         | 5201                              | 11.5         | 0.05                 |
| Died During Year                                                |                                 | 2.1%         |                                   | 1.9%         | 0.60                 |
| <b>Demographic Characteristics</b>                              |                                 |              |                                   |              |                      |
| Age in Years, <i>MEAN (SD)</i>                                  | 2643                            | 54.1 (9.0)   | 5201                              | 50.8 (11.7)  | <.001                |
| Sex                                                             |                                 |              |                                   |              |                      |
| Male                                                            |                                 | 48.6%        |                                   | 51.9%        | 0.07                 |
| Female                                                          |                                 | 51.4%        |                                   | 48.1%        |                      |
| Minority Race and Ethnicity                                     |                                 | 35.9%        |                                   | 27.8%        | <.001                |
| Black                                                           |                                 | 19.2%        |                                   | 15.9%        |                      |
| Hispanic                                                        |                                 | 14.3%        |                                   | 8.2%         |                      |
| Native American                                                 |                                 | 1.4%         |                                   | 1.6%         |                      |
| Asian/Pacific Islander                                          |                                 | 0.9%         |                                   | 2.1%         |                      |
| Other Race and Ethnicity                                        |                                 | 63.5%        |                                   | 71.5%        |                      |
| White                                                           |                                 | 58.9%        |                                   | 67.3%        |                      |
| Multiracial                                                     |                                 | 4.6%         |                                   | 4.1%         |                      |
| Veteran (served in U.S. Armed Forces)                           |                                 | 6.5%         |                                   | 8.5%         | 0.08                 |
| <b>Other Health Insurance</b>                                   |                                 |              |                                   |              |                      |
| Medicaid (dually-enrolled)                                      | 2643                            | 49.8%        | 5201                              | 55.6%        | 0.02                 |
| Private (including medical, drug, vision, and dental)           |                                 | 13.4%        |                                   | 25.3%        | <.001                |
| Medicare Part D (standalone or with Part C)                     |                                 | 96.9%        |                                   | 79.7%        | <.001                |
| <b>Social Risk Factors</b>                                      |                                 |              |                                   |              |                      |
| Annual Income in Thousands, <i>MEAN (SD)</i>                    | 2643                            | 26.1 (37.6)  | 5201                              | 25.6 (31.2)  | 0.76                 |
| Poverty ( $\leq 100\%$ of Federal Poverty Level)                |                                 | 36.7%        |                                   | 42.8%        | 0.002                |
| Education                                                       |                                 |              |                                   |              |                      |
| No High School or College Education                             |                                 | 21.7%        |                                   | 21.7%        | 0.11                 |
| High School / Some College Education                            |                                 | 68.1%        |                                   | 68.1%        |                      |
| College / Graduate School Education                             |                                 | 10.2%        |                                   | 10.2%        |                      |
| Lives Alone                                                     | 2593                            | 29.7%        | 5118                              | 29.7%        | 0.12                 |
| <b>Health Behaviors and Status</b>                              |                                 |              |                                   |              |                      |

|                                                                                                                                                                                                                                                                                                                                              |      |           |      |           |       |
|----------------------------------------------------------------------------------------------------------------------------------------------------------------------------------------------------------------------------------------------------------------------------------------------------------------------------------------------|------|-----------|------|-----------|-------|
| Current Smoker                                                                                                                                                                                                                                                                                                                               | 2537 | 31.1%     | 5006 | 33.0%     | 0.37  |
| Alcohol Abuse ( $\geq 4$ Alcoholic Drinks Most Days)                                                                                                                                                                                                                                                                                         |      | 20.4%     |      | 18.7%     | 0.29  |
| Obese (Body Mass Index $\geq 30$ )                                                                                                                                                                                                                                                                                                           |      | 45.7%     |      | 47.1%     | 0.51  |
| Poor Self-Rated Health                                                                                                                                                                                                                                                                                                                       |      | 56.2%     |      | 56.3%     | 0.96  |
| ADLs with Difficulty/Can't Do (0-6), <i>MEAN (SD)</i>                                                                                                                                                                                                                                                                                        |      | 1.4 (1.7) |      | 1.4 (1.9) | 0.87  |
| IADLs with Difficulty/Can't Do (0-6), <i>MEAN (SD)</i>                                                                                                                                                                                                                                                                                       |      | 1.7 (1.6) |      | 1.9 (1.9) | 0.02  |
| <b>Health Conditions</b>                                                                                                                                                                                                                                                                                                                     |      |           |      |           |       |
| Diabetes                                                                                                                                                                                                                                                                                                                                     | 2562 | 40.5%     | 5056 | 34.5%     | 0.003 |
| Heart Failure                                                                                                                                                                                                                                                                                                                                |      | 9.7%      |      | 9.0%      | 0.55  |
| Ischemic Heart Disease                                                                                                                                                                                                                                                                                                                       |      | 18.5%     |      | 14.6%     | 0.01  |
| COPD/Asthma                                                                                                                                                                                                                                                                                                                                  |      | 34.0%     |      | 31.4%     | 0.15  |
| Mental Health Condition <sup>e</sup>                                                                                                                                                                                                                                                                                                         | 2643 | 60.6%     | 5201 | 62.6%     | 0.30  |
| Intellectual and/or Developmental Disability                                                                                                                                                                                                                                                                                                 |      | 13.1%     |      | 15.3%     | 0.07  |
| <b>Local Area Characteristics</b>                                                                                                                                                                                                                                                                                                            |      |           |      |           |       |
| Rural                                                                                                                                                                                                                                                                                                                                        | 2641 | 17.1%     | 5200 | 28.0%     | <.001 |
| Urban                                                                                                                                                                                                                                                                                                                                        |      | 82.9%     |      | 72.0%     |       |
| Medicare Advantage Market Penetration Rate                                                                                                                                                                                                                                                                                                   | 2642 | 37.7%     | 5201 | 29.7%     | <.001 |
| Abbreviations: N, number; ADLs, activities of daily living; IADLs, instrumental ADLs; COPD, chronic obstructive pulmonary disease; MCBS, Medicare Current Beneficiary Survey.                                                                                                                                                                |      |           |      |           |       |
| <sup>a</sup> Medicare Advantage beneficiaries ages 18-64 living in the community in a U.S. zip code with a current entitlement status of disabled, at least 1-month of enrollment in Part A+B benefits, and at least one MCBS survey completed.                                                                                              |      |           |      |           |       |
| <sup>b</sup> Traditional Medicare beneficiaries ages 18-64 living in the community in a U.S. zip code with a current entitlement status of disabled, at least 1-month of enrollment in Part A+B benefits, and at least one MCBS survey completed.                                                                                            |      |           |      |           |       |
| <sup>c</sup> P-value on the Wald Test of significance, equivalent to the F-statistic for continuous variables and the Chi-squared statistic for categorical variables.                                                                                                                                                                       |      |           |      |           |       |
| <sup>d</sup> Reporting unweighted sample size. Estimates from the 2015-2018 MCBS weighted to be nationally representative using cross-sectional weights accounting for the overall annual selection probability of each person sampled and including adjustments for the stratified sampling design, survey nonresponse, and coverage error. |      |           |      |           |       |
| <sup>e</sup> Self-reported any psychiatric illness, including depression.                                                                                                                                                                                                                                                                    |      |           |      |           |       |

**eTable 5. Characteristics of Community-Dwelling Medicare Advantage Beneficiaries with Disability Entitlement by Special Needs Plan vs Non Special Needs Plan Enrollment, Ages 18-64, 2015-2018.**

|                                                                 | Special Needs Plan | Non Special Needs Plan <sup>a</sup> | P-Value <sup>b</sup> |
|-----------------------------------------------------------------|--------------------|-------------------------------------|----------------------|
| <b>Total Number of Patient Years, Unweighted, N<sup>c</sup></b> | <b>762</b>         | <b>1,399</b>                        | <b>--</b>            |
| <b>Demographic Characteristics</b>                              |                    |                                     |                      |
| Age in Years, <i>MEAN (SD)</i>                                  | 51.3 (11.3)        | 55.5 (7.4)                          | <.001                |
| Sex                                                             |                    |                                     |                      |
| Male                                                            | 44.0%              | 48.4%                               | 0.30                 |
| Female                                                          | 56.0%              | 51.6%                               |                      |
| Minority Race and Ethnicity                                     | 48.1%              | 28.8%                               | 0.004                |
| Black                                                           | 25.9%              | 15.4%                               |                      |
| Hispanic                                                        | 20.3%              | 11.4%                               |                      |
| Native American                                                 | 1.0%               | 1.2%                                |                      |
| Asian/Pacific Islander                                          | 0.9%               | 0.8%                                |                      |
| Other Race and Ethnicity                                        | 51.9%              | 71.2%                               |                      |
| White                                                           | 49.7%              | 65.4%                               |                      |
| Multiracial                                                     | 2.2%               | 5.8%                                |                      |
| Veteran (served in U.S. Armed Forces)                           | 2.5%               | 8.0%                                | 0.03                 |
| <b>Other Health Insurance</b>                                   |                    |                                     |                      |
| Medicaid (dually-enrolled)                                      | 95.7%              | 32.9%                               | <.001                |
| Private (including medical, drug, vision, and dental)           | 6.5%               | 12.4%                               | 0.007                |
| Medicare Part D (standalone or with Part C)                     | 100.0%             | 98.8%                               | NE                   |
| <b>Social Risk Factors</b>                                      |                    |                                     |                      |
| Annual Income in Thousands, <i>MEAN (SD)</i>                    | 17.6 (54.6)        | 27.4 (28.1)                         | <.001                |
| Poverty ( $\leq 100\%$ of Federal Poverty Level)                | 62.9%              | 27.3%                               | <.001                |
| Education                                                       |                    |                                     |                      |
| No High School or College Education                             | 34.8%              | 17.0%                               | <.001                |
| High School / Some College Education                            | 62.2%              | 70.7%                               |                      |
| College / Graduate School Education                             | 3.0%               | 12.3%                               |                      |
| Lives Alone                                                     | 31.9%              | 29.3%                               | 0.49                 |
| <b>Health Behaviors and Status</b>                              |                    |                                     |                      |
| Current Smoker                                                  | 38.4%              | 30.7%                               | 0.04                 |
| Alcohol Abuse ( $\geq 4$ Alcoholic Drinks Most Days)            | 20.8%              | 21.6%                               | 0.78                 |
| Obese (Body Mass Index $\geq 30$ )                              | 47.4%              | 44.8%                               | 0.47                 |
| Poor Self-Rated Health                                          | 59.0%              | 57.7%                               | 0.74                 |
| ADLS with Difficulty/Can't Do (0-6), <i>MEAN (SD)</i>           | 1.5 (2.0)          | 1.5 (1.6)                           | 0.91                 |
| IADLs with Difficulty/Can't Do (0-6), <i>MEAN (SD)</i>          | 1.8 (1.9)          | 1.7 (1.5)                           | 0.63                 |

| <b>Health Conditions</b>                                                                                                                                                                                                                                                                                                                                                                                                                                                                                                                                                                                                                                     |       |       |      |
|--------------------------------------------------------------------------------------------------------------------------------------------------------------------------------------------------------------------------------------------------------------------------------------------------------------------------------------------------------------------------------------------------------------------------------------------------------------------------------------------------------------------------------------------------------------------------------------------------------------------------------------------------------------|-------|-------|------|
| Diabetes                                                                                                                                                                                                                                                                                                                                                                                                                                                                                                                                                                                                                                                     | 47.3% | 38.8% | 0.01 |
| Heart Failure                                                                                                                                                                                                                                                                                                                                                                                                                                                                                                                                                                                                                                                | 11.8% | 9.8%  | 0.46 |
| Ischemic Heart Disease                                                                                                                                                                                                                                                                                                                                                                                                                                                                                                                                                                                                                                       | 22.0% | 17.7% | 0.21 |
| COPD/Asthma                                                                                                                                                                                                                                                                                                                                                                                                                                                                                                                                                                                                                                                  | 38.7% | 33.2% | 0.23 |
| Mental Health Condition <sup>d</sup>                                                                                                                                                                                                                                                                                                                                                                                                                                                                                                                                                                                                                         | 62.8% | 64.6% | 0.64 |
| Intellectual and/or Developmental Disability                                                                                                                                                                                                                                                                                                                                                                                                                                                                                                                                                                                                                 | 17.0% | 11.5% | 0.02 |
| <b>Local Area Characteristics</b>                                                                                                                                                                                                                                                                                                                                                                                                                                                                                                                                                                                                                            |       |       |      |
| Rural                                                                                                                                                                                                                                                                                                                                                                                                                                                                                                                                                                                                                                                        | 18.4% | 16.7% | 0.75 |
| Urban                                                                                                                                                                                                                                                                                                                                                                                                                                                                                                                                                                                                                                                        | 81.6% | 83.3% |      |
| Medicare Advantage Market Penetration Rate                                                                                                                                                                                                                                                                                                                                                                                                                                                                                                                                                                                                                   | 39.6% | 37.4% | 0.12 |
| Abbreviations: N, number; ADLs, activities of daily living; IADLs, instrumental ADLs; COPD, chronic obstructive pulmonary disease; MCBS, Medicare Current Beneficiary Survey; NE, not estimable.                                                                                                                                                                                                                                                                                                                                                                                                                                                             |       |       |      |
| <sup>a</sup> Special Needs Plans (SNPs) for chronic and disabling conditions, dually enrolled Medicare-Medicaid beneficiaries, and beneficiaries institutionalized in long-term care.                                                                                                                                                                                                                                                                                                                                                                                                                                                                        |       |       |      |
| <sup>b</sup> P-value on the Wald Test of significance, equivalent to the F-statistic for continuous variables and the Chi-squared statistic for categorical variables.                                                                                                                                                                                                                                                                                                                                                                                                                                                                                       |       |       |      |
| <sup>c</sup> Reporting unweighted sample size for Medicare Advantage beneficiaries with available plan and contract data in the MCBS ages 18-64 living in the community in a U.S. zip code with a current entitlement status of disabled, at least 1-calendar-year of continuous enrollment in Part A+B benefits, and completed the annual MCBS survey rounds. Estimates from the 2015-2018 MCBS weighted to be nationally representative using cross-sectional weights accounting for the overall annual selection probability of each person sampled and including adjustments for the stratified sampling design, survey nonresponse, and coverage error. |       |       |      |
| <sup>d</sup> Mental health conditions include any self-reported psychiatric illness, including depression                                                                                                                                                                                                                                                                                                                                                                                                                                                                                                                                                    |       |       |      |

**eTable 6. Association of Medicare Advantage vs. Traditional Medicare with Ambulatory Care Access and Quality for Beneficiaries with Disability Entitlement, 2015-2018. With Dartmouth Hospital Referral Region Fixed Effects.**

|                                                                                                                                                                                                                                                                                                                                                                                                                                                                                                                                                                                                                                                                                                                                                                                                                                           | Adjusted Marginal Difference of MA vs TM    |                                                                    |
|-------------------------------------------------------------------------------------------------------------------------------------------------------------------------------------------------------------------------------------------------------------------------------------------------------------------------------------------------------------------------------------------------------------------------------------------------------------------------------------------------------------------------------------------------------------------------------------------------------------------------------------------------------------------------------------------------------------------------------------------------------------------------------------------------------------------------------------------|---------------------------------------------|--------------------------------------------------------------------|
|                                                                                                                                                                                                                                                                                                                                                                                                                                                                                                                                                                                                                                                                                                                                                                                                                                           | Regression Results<br>(95% CI) <sup>a</sup> | Propensity-Weighted<br>Regression Results<br>(95% CI) <sup>b</sup> |
| <b>Access<sup>c</sup></b>                                                                                                                                                                                                                                                                                                                                                                                                                                                                                                                                                                                                                                                                                                                                                                                                                 |                                             |                                                                    |
| Usual Source of Care, %                                                                                                                                                                                                                                                                                                                                                                                                                                                                                                                                                                                                                                                                                                                                                                                                                   | 2.0 (0.7, 3.2)                              | 1.4 (0.0, 2.8)                                                     |
| Usual Source of Care is PCP, %                                                                                                                                                                                                                                                                                                                                                                                                                                                                                                                                                                                                                                                                                                                                                                                                            | 4.6 (0.7, 8.4)                              | 2.6 (-1.1, 6.4)                                                    |
| Specialist Visit, %                                                                                                                                                                                                                                                                                                                                                                                                                                                                                                                                                                                                                                                                                                                                                                                                                       | 5.4 (1.3, 9.4)                              | 6.1 (1.6, 10.7)                                                    |
| <b>Quality</b>                                                                                                                                                                                                                                                                                                                                                                                                                                                                                                                                                                                                                                                                                                                                                                                                                            |                                             |                                                                    |
| Annual Cholesterol Screen, % <sup>d</sup>                                                                                                                                                                                                                                                                                                                                                                                                                                                                                                                                                                                                                                                                                                                                                                                                 | 0.9 (0.0, 1.8)                              | 1.3 (0.2, 2.4)                                                     |
| Annual Flu Shot, % <sup>e</sup>                                                                                                                                                                                                                                                                                                                                                                                                                                                                                                                                                                                                                                                                                                                                                                                                           | 11.3 (6.7, 15.9)                            | 11.8 (6.8, 16.8)                                                   |
| Colon Cancer Screening, % <sup>f</sup>                                                                                                                                                                                                                                                                                                                                                                                                                                                                                                                                                                                                                                                                                                                                                                                                    | 10.4 (5.1, 15.7)                            | 10.2 (4.6, 15.9)                                                   |
| Abbreviations: CI, confidence interval; PCP, primary care provider; MA, Medicare Advantage.                                                                                                                                                                                                                                                                                                                                                                                                                                                                                                                                                                                                                                                                                                                                               |                                             |                                                                    |
| <sup>a</sup> We estimated multivariable logistic regression models for each outcome that also adjusted for the characteristics listed in Table 2 (with race/ethnicity collapsed into minority vs. other). We added fixed effects for the Dartmouth hospital referral regions that beneficiaries resided in to control for regional differences in supply of medical services, clinician practice intensity, and coding intensity. We included year fixed effects to control for secular trend and adjusted our p-values for the complex survey design of the MCBS and intra-person correlation over time. We used Stata's Margins command to report our results as the marginal difference of MA vs. TM for the dependent variables by modeling the response in the dependent variables to the exposure variable at the population means. |                                             |                                                                    |
| <sup>b</sup> We estimated the same multivariable logistic regression models as in a, but this time reweighting the sample using the propensity score weights described previously in order to change the distribution of observed confounders in both the treated (Medicare Advantage) and untreated (traditional Medicare) beneficiaries so that they are the same as the distribution in the entire sample. These estimates should be interpreted as what we would expect to see if every Medicare beneficiary in our nationally representative sample enrolled in Medicare Advantage vs what we would expect to see if no-one enrolled in Medicare Advantage (i.e. the average treatment effects).                                                                                                                                     |                                             |                                                                    |
| <sup>c</sup> Unweighted sample n=6,525. Met baseline study inclusion and responded to MCBS questions for outcome variables.                                                                                                                                                                                                                                                                                                                                                                                                                                                                                                                                                                                                                                                                                                               |                                             |                                                                    |

<sup>d</sup>Unweighted sample n=2,715. Met baseline study inclusion and exclusion criteria and self-reported having diabetes, ischemic heart disease, or heart failure and responded to MCBS questions for outcome variable.

<sup>e</sup>Unweighted sample n=6,462. Met baseline study inclusion and exclusion criteria and responded to MCBS question for outcome variable.

<sup>f</sup>Fecal occult blood test at home or doctor's office or colonoscopy or sigmoidoscopy within past 5 years, excluding patients who self-reported having colon cancer or are under age 45. Unweighted sample n=3,233 for patients who met above criteria as well as baseline study inclusion and exclusion criteria and responded to MCBS questions for outcome variable.

**eTable 7. Association of Medicare Advantage vs. Traditional Medicare with Ambulatory Care Access and Quality for Beneficiaries with Disability Entitlement, 2015-2018. After Relaxing Continuous Enrollment Inclusion Criteria.**

|                                                                                                                                                                                                                                                                                                                                                                                                                                                                                                                                                                                                                                                                                                                                                                                                                                                                                                                              | Unadjusted Results |                      |                              | Adjusted Marginal Difference             |
|------------------------------------------------------------------------------------------------------------------------------------------------------------------------------------------------------------------------------------------------------------------------------------------------------------------------------------------------------------------------------------------------------------------------------------------------------------------------------------------------------------------------------------------------------------------------------------------------------------------------------------------------------------------------------------------------------------------------------------------------------------------------------------------------------------------------------------------------------------------------------------------------------------------------------|--------------------|----------------------|------------------------------|------------------------------------------|
|                                                                                                                                                                                                                                                                                                                                                                                                                                                                                                                                                                                                                                                                                                                                                                                                                                                                                                                              | Medicare Advantage | Traditional Medicare | Absolute Difference (95% CI) | Medicare Advantage (95% CI) <sup>a</sup> |
| <b>Access<sup>b</sup></b>                                                                                                                                                                                                                                                                                                                                                                                                                                                                                                                                                                                                                                                                                                                                                                                                                                                                                                    |                    |                      |                              |                                          |
| Usual Source of Care, %                                                                                                                                                                                                                                                                                                                                                                                                                                                                                                                                                                                                                                                                                                                                                                                                                                                                                                      | 90.3               | 84.5                 | 5.8 (3.7, 8.0)               | 4.2 (1.8, 6.6)                           |
| Usual Source of Care is PCP, %                                                                                                                                                                                                                                                                                                                                                                                                                                                                                                                                                                                                                                                                                                                                                                                                                                                                                               | 77.5               | 69.6                 | 7.9 (4.1, 11.7)              | 5.3 (1.4, 9.3)                           |
| Specialist Visit, %                                                                                                                                                                                                                                                                                                                                                                                                                                                                                                                                                                                                                                                                                                                                                                                                                                                                                                          | 53.3               | 44.4                 | 8.9 (5.0, 12.8)              | 4.5 (0.8, 8.3)                           |
| <b>Quality</b>                                                                                                                                                                                                                                                                                                                                                                                                                                                                                                                                                                                                                                                                                                                                                                                                                                                                                                               |                    |                      |                              |                                          |
| Annual Cholesterol Screen, % <sup>c</sup>                                                                                                                                                                                                                                                                                                                                                                                                                                                                                                                                                                                                                                                                                                                                                                                                                                                                                    | 90.8               | 85.9                 | 5.0 (1.8, 8.2)               | 4.3 (1.1, 7.5)                           |
| Annual Flu Shot, % <sup>d</sup>                                                                                                                                                                                                                                                                                                                                                                                                                                                                                                                                                                                                                                                                                                                                                                                                                                                                                              | 61.9               | 50.4                 | 11.5 (7.4, 15.5)             | 11.5 (6.7, 16.4)                         |
| Colon Cancer Screening, % <sup>e</sup>                                                                                                                                                                                                                                                                                                                                                                                                                                                                                                                                                                                                                                                                                                                                                                                                                                                                                       | 68.4               | 54.7                 | 13.7 (9.5, 18.0)             | 11.3 (6.8, 15.9)                         |
| Abbreviations: CI, confidence interval; PCP, primary care clinician; MA, Medicare Advantage.                                                                                                                                                                                                                                                                                                                                                                                                                                                                                                                                                                                                                                                                                                                                                                                                                                 |                    |                      |                              |                                          |
| <sup>a</sup> We estimated multivariable logistic regression models for each outcome that also adjusted for the demographic, health insurance, social risk, and local area characteristics listed in Table 2 (with race/ethnicity collapsed into minority vs. other and excluding living alone). We added fixed effects for the states that beneficiaries resided in to control for state policy differences and state differences in supply of medical services, clinician practice intensity, and coding intensity. We included year fixed effects to control for secular trend and adjusted our p-values for the complex survey design of the MCBS and intra-person correlation over time. We used Stata's Margins command to report our results as the marginal difference of MA vs. TM for the dependent variables by modeling the response in the dependent variables to the exposure variable at the population means. |                    |                      |                              |                                          |
| <sup>b</sup> Unweighted sample n=6,760 (unadjusted) and 6,725 (adjusted). Met baseline study inclusion and responded to MCBS questions for outcome variables.                                                                                                                                                                                                                                                                                                                                                                                                                                                                                                                                                                                                                                                                                                                                                                |                    |                      |                              |                                          |
| <sup>c</sup> Unweighted sample n=2,837 (unadjusted) and 2,815 (adjusted). Met baseline study inclusion and exclusion criteria and self-reported having diabetes, ischemic heart disease, or heart failure and responded to MCBS questions for outcome variable.                                                                                                                                                                                                                                                                                                                                                                                                                                                                                                                                                                                                                                                              |                    |                      |                              |                                          |
| <sup>d</sup> Unweighted sample n=6,901 (unadjusted) and 6,865 (adjusted). Met baseline study inclusion and exclusion criteria and responded to MCBS question for outcome variable.                                                                                                                                                                                                                                                                                                                                                                                                                                                                                                                                                                                                                                                                                                                                           |                    |                      |                              |                                          |
| <sup>e</sup> Fecal occult blood test at home or doctor's office or colonoscopy or sigmoidoscopy within past 5 years, excluding patients who self-reported having colon cancer or are under age 45. Unweighted sample n=3,380 (unadjusted) and 3,355 (adjusted) for patients who met above criteria as well as baseline study inclusion and exclusion criteria and responded to MCBS questions for outcome variable.                                                                                                                                                                                                                                                                                                                                                                                                                                                                                                          |                    |                      |                              |                                          |

**eTable 8. Association of Medicare Advantage vs. Traditional Medicare with Ambulatory Care Access and Quality for Beneficiaries with Disability Entitlement, 2015-2018. Testing for Heterogeneous Treatment Effects by Level of Functional Impairment.**

|                                                                                                                                                                                                                                                                                                                                                                                                                                                                                                                                                                                                                                                                                                                                                                                                                                                                                                                                                                                                             | Adjusted Marginal Difference <sup>a</sup> |                                                                       |                                                                        |
|-------------------------------------------------------------------------------------------------------------------------------------------------------------------------------------------------------------------------------------------------------------------------------------------------------------------------------------------------------------------------------------------------------------------------------------------------------------------------------------------------------------------------------------------------------------------------------------------------------------------------------------------------------------------------------------------------------------------------------------------------------------------------------------------------------------------------------------------------------------------------------------------------------------------------------------------------------------------------------------------------------------|-------------------------------------------|-----------------------------------------------------------------------|------------------------------------------------------------------------|
|                                                                                                                                                                                                                                                                                                                                                                                                                                                                                                                                                                                                                                                                                                                                                                                                                                                                                                                                                                                                             | Medicare Advantage (95% CI)               | Interaction of Medicare Advantage & Count of ADL Limitations (95% CI) | Interaction of Medicare Advantage & Count of IADL Limitations (95% CI) |
| <b>Access<sup>b</sup></b>                                                                                                                                                                                                                                                                                                                                                                                                                                                                                                                                                                                                                                                                                                                                                                                                                                                                                                                                                                                   |                                           |                                                                       |                                                                        |
| Usual Source of Care, %                                                                                                                                                                                                                                                                                                                                                                                                                                                                                                                                                                                                                                                                                                                                                                                                                                                                                                                                                                                     | 5.1 (1.7, 8.4)                            | 0.4 (-1.1, 2.0)                                                       | -1.3 (-2.8, 0.2)                                                       |
| Usual Source of Care is PCP, %                                                                                                                                                                                                                                                                                                                                                                                                                                                                                                                                                                                                                                                                                                                                                                                                                                                                                                                                                                              | 6.3 (1.0, 11.5)                           | -0.8 (-3.2, 1.6)                                                      | -0.1 (-2.3, 2.1)                                                       |
| Specialist Visit, %                                                                                                                                                                                                                                                                                                                                                                                                                                                                                                                                                                                                                                                                                                                                                                                                                                                                                                                                                                                         | 7.4 (1.4, 13.4)                           | 2.9 (0.3, 5.5)                                                        | -3.9 (-6.6, -1.1)                                                      |
| <b>Quality</b>                                                                                                                                                                                                                                                                                                                                                                                                                                                                                                                                                                                                                                                                                                                                                                                                                                                                                                                                                                                              |                                           |                                                                       |                                                                        |
| Annual Cholesterol Screen, % <sup>c</sup>                                                                                                                                                                                                                                                                                                                                                                                                                                                                                                                                                                                                                                                                                                                                                                                                                                                                                                                                                                   | 2.9 (-0.6, 6.5)                           | 1.2 (-0.4, 2.8)                                                       | -0.8 (-2.7, 1.2)                                                       |
| Annual Flu Shot, % <sup>d</sup>                                                                                                                                                                                                                                                                                                                                                                                                                                                                                                                                                                                                                                                                                                                                                                                                                                                                                                                                                                             | 8.5 (2.1, 14.8)                           | -0.6 (-3.4, 2.1)                                                      | 1.5 (-1.5, 4.4)                                                        |
| Colon Cancer Screening, % <sup>e</sup>                                                                                                                                                                                                                                                                                                                                                                                                                                                                                                                                                                                                                                                                                                                                                                                                                                                                                                                                                                      | 12.9 (5.6, 20.2)                          | 2.2 (-0.9, 5.4)                                                       | -2.8 (-5.9, 0.3)                                                       |
| Abbreviations: CI, confidence interval; PCP, primary care clinician; MA, Medicare Advantage.                                                                                                                                                                                                                                                                                                                                                                                                                                                                                                                                                                                                                                                                                                                                                                                                                                                                                                                |                                           |                                                                       |                                                                        |
| <sup>a</sup> We estimated multivariable logistic regression models for each outcome that also adjusted for the characteristics listed in Table 2 (with race/ethnicity collapsed into minority vs. other and with functional impairment defined as below instead of count of ADL and IADL limitations). We added fixed effects for the state that beneficiaries resided in to control for regional differences in supply of medical services, clinician practice intensity, and coding intensity. We included year fixed effects to control for secular trend and adjusted our p-values for the complex survey design of the MCBS and intra-person correlation over time. We used Stata's Margins command to report our results as the marginal difference of MA vs. TM, and the interaction of MA with beneficiaries' counts of ADL and IADL limitations, respectively, on the dependent variables by modeling the response in the dependent variables to these exposure variables at the population means. |                                           |                                                                       |                                                                        |
| <sup>b</sup> Unweighted sample n=6,525. Met baseline study inclusion and responded to MCBS questions for outcome variables.                                                                                                                                                                                                                                                                                                                                                                                                                                                                                                                                                                                                                                                                                                                                                                                                                                                                                 |                                           |                                                                       |                                                                        |



<sup>c</sup>Unweighted sample n=2,715. Met baseline study inclusion and exclusion criteria and self-reported having diabetes, ischemic heart disease, or heart failure and responded to MCBS questions for outcome variable.

<sup>d</sup>Unweighted sample n=6,462. Met baseline study inclusion and exclusion criteria and responded to MCBS question for outcome variable.

<sup>e</sup>Fecal occult blood test at home or doctor's office or colonoscopy or sigmoidoscopy within past 5 years, excluding patients who self-reported having colon cancer or are under age 45. Unweighted sample n=3,233 for patients who met above criteria as well as baseline study inclusion and exclusion criteria and responded to MCBS questions for outcome variable.

## eReferences

1. Garrido MM, Kelley AS, Paris J, et al. Methods for Constructing and Assessing Propensity Scores. *Health Serv Res*. 2014;49(5):1701-1720. doi:10.1111/1475-6773.12182
2. Cutler DM, Ghosh K, Messer KL, Raghunathan TE, Stewart ST, Rosen AB. Explaining The Slowdown In Medical Spending Growth Among The Elderly, 1999–2012. *Health Aff (Millwood)*. 2019;38(2):222-229. doi:10.1377/hlthaff.2018.05372
3. Cutler D, Ghosh K, Messer K, Raghunathan T, Rosen A, Stewart S. *A Satellite Account for Health in the United States*. National Bureau of Economic Research; 2020:w27848. doi:10.3386/w27848
